# Supplementary material for: The coproduction of a multilevel personal narrative intervention for people with aphasia in a community communication support group—A pilot study
Source: Frontiers journal article supplement (doi:10.3389/fstro.2024.1393676), 2024-07-17
Supplement: Data_Sheet_3.pdf [file Data_Sheet_3.pdf]

## Supplementary Material

### Appendix 3

Figure 3 A screenshot of the questionnaire providing an example of the scale and the presentation of the questions used in the content validity study.

14. Τα θέματα που συζητούσα ήταν κατάλληλα για μένα. \*

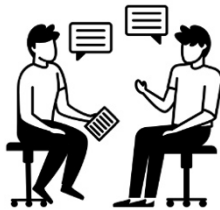

1 😞 Διαφωνώ ... 2 😞 Διαφωνώ 3 😞 Ουδέτερο 4 😊 Συμφωνώ 5 😊 Συμφωνώ...

Σημειώνω

☐☐☐☐☐
